# Supplementary material for: Facile formulation of a long-wavelength cyanine for optical imaging in the second near-infrared window
Source: Royal Society of Chemistry journal article supplement (doi:10.1039/d0bm00572j), 2020-01-01
Supplement: d0bm00572j1.pdf [file d0bm00572j1.pdf]

## Supporting Information: Facile formulation of a long wavelength cyanine for optical imaging in the second near-infrared window

Hailey I. Kilian<sup>a</sup>, Homan Kang<sup>b</sup>, Nikhila Nyayapathi<sup>a</sup>, Takeshi Fukuda,<sup>b</sup> Eeswar Adluru<sup>b</sup>, Huijuan Zhang<sup>a</sup>, Brendan Qinn<sup>a</sup>, Jun Xia<sup>a</sup>, Hak Soo Choi<sup>b</sup>, and Jonathan F. Lovell<sup>a†</sup>

† Correspondence jflovel@buffalo.edu.

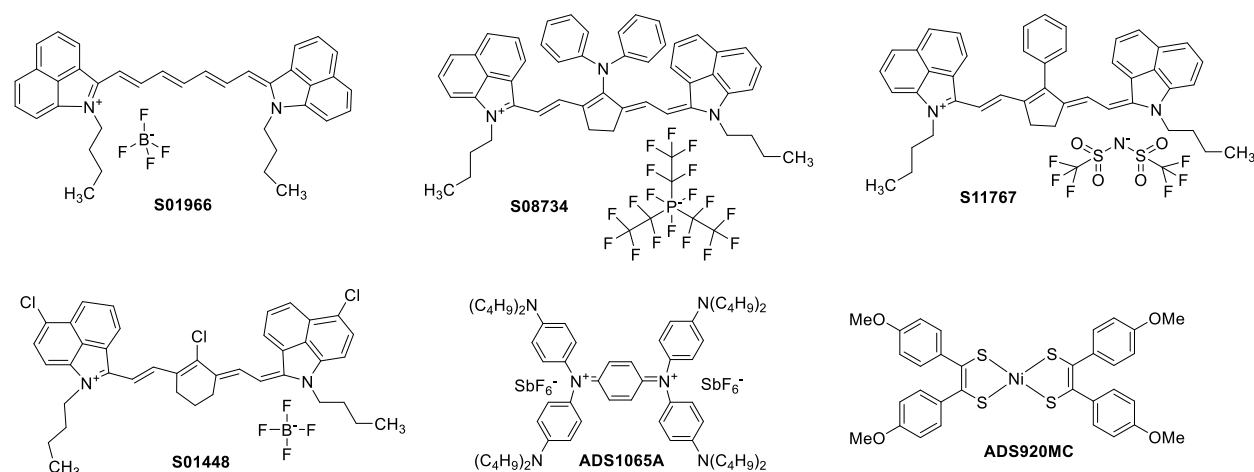

**Figure S1:** Structures of dyes used in this study

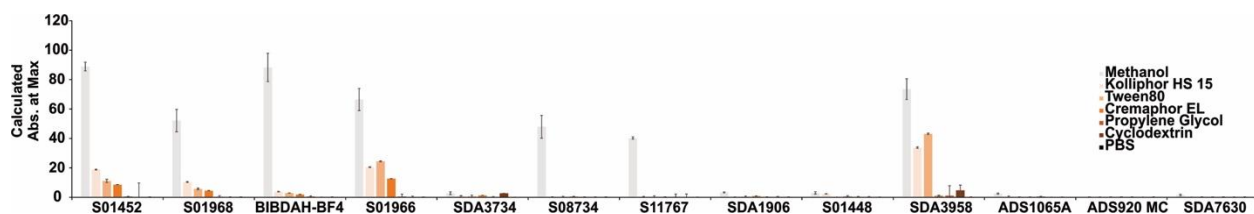

**Figure S2:** Maximum calculated absorption (at the wavelength of maximum absorption) of all dyes in various surfactants and solvents

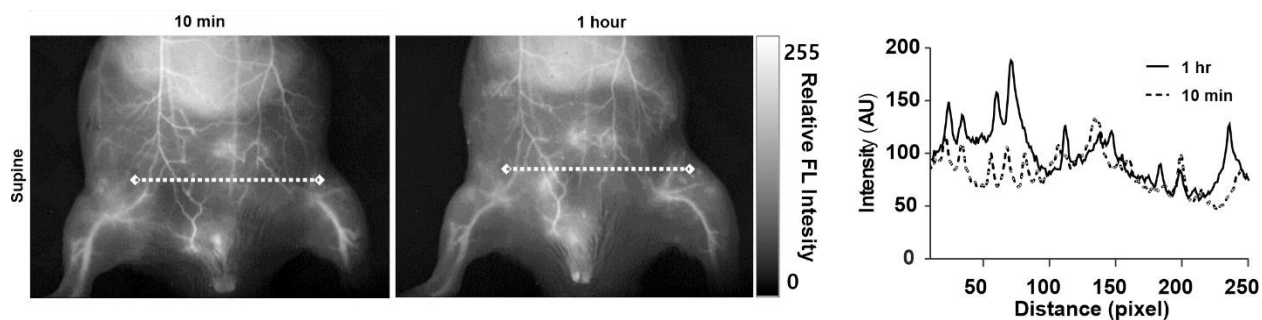

**Figure S3:** Cross-sectional line profile of the NIR-II fluorescence abdomen images compared at 10 mins and 1 hr after BIBDAH administration. The intensity profiles are quantified in the graph on the right and show relative signal of blood vessels in the line of interest over background.
